# Supplementary material for: Building the bridge between safety requirements and numerical modeling: an example considering crack development of Opalinus clay in laboratory and field scales
Source: Copernicus journal article supplement (doi:10.5194/sand-1-165-2021), 2021-11-10
Supplement: Supplementary file 1 [file sand-1-165-2021-supplement.pdf]

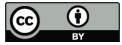

*Supplement of*

**Building the bridge between safety requirements and numerical modeling: an example considering crack development of Opalinus clay in laboratory and field scales**

**Tuanny Cajuhi et al.**

*Correspondence to:* Tuanny Cajuhi (tuanny.cajuhi@bgr.de)

The copyright of individual parts of the supplement might differ from the article licence.

# Building the bridge between safety requirements and numerical modeling: An example considering crack development of Opalinus Clay in laboratory and field scales

Tuanny Cajuhi, Jobst Maßmann and Gesa Ziefle

Bundesanstalt für Geowissenschaften und Rohstoffe (BGR)

# Motivation & Aims

## ■ Motivation

- Radioactive waste needs to be stored in a safe and sustainable manner
- The integrity of the rock, i.e. its containment capabilities, must be ensured
- Understanding the coupled phenomena taking place in the rock needs, ideally, to occur at the in-situ scale

## ■ Aims

- Correlate process understanding in the near field and its impact on the integrity of the containment providing rock zone (CRZ)
- Illustrate an example for the role of numerical modeling in safety assessment

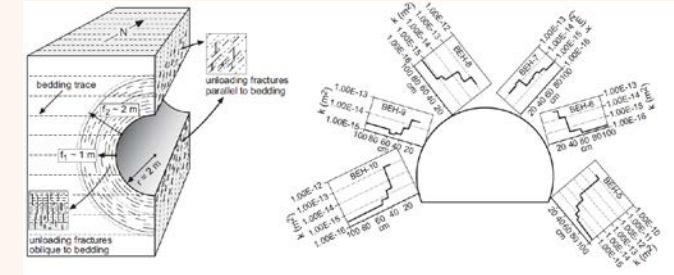

Conceptual model extracted from [Tsang et al. 2012]

- “The term integrity describes the conservation of the properties related to the confining capacity of the containment providing rock zone of a repository”  
„Der Begriff Integrität beschreibt den Erhalt der Eigenschaften des Einschlussvermögens des einschlusswirksamen Gebirgsbereichs eines Endlagers“ [BMU 2020]
- What can affect the integrity? For how long?
- Which processes are correlated to a possible integrity loss?

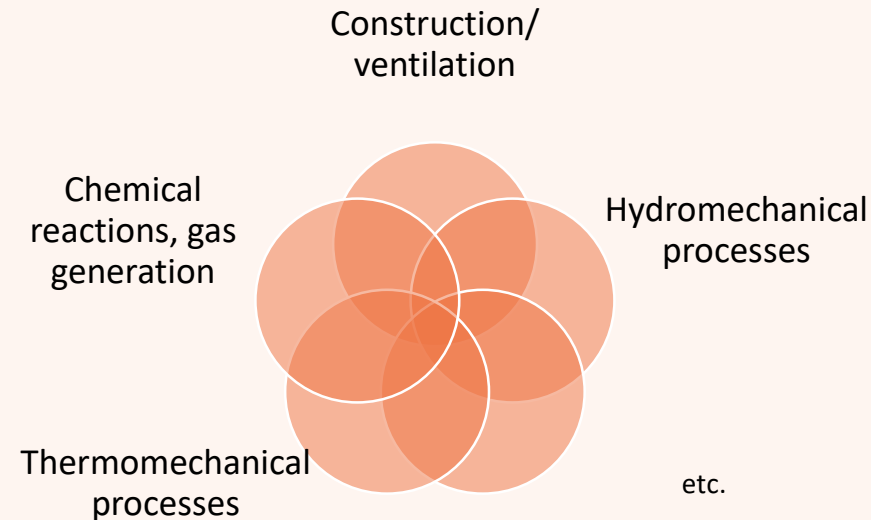

# In the field

- Initial condition
- Excavation
  - Stress redistribution
  - Plastic behavior (shear / compressive strength criterion)
  - EDZ development (cracks, permeability increase)
- Functional period
  - Wetting and drying (seasonal changes)
  - Further degradation and/or increase of EDZ
    - Cracks due to drying

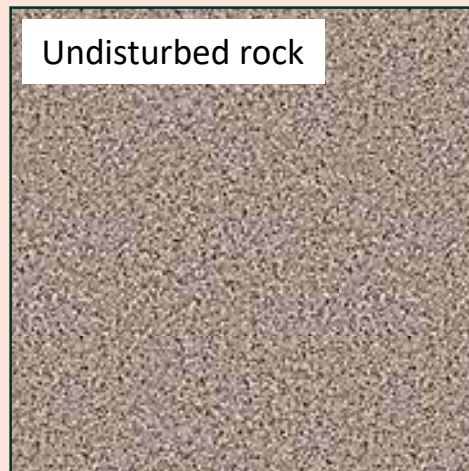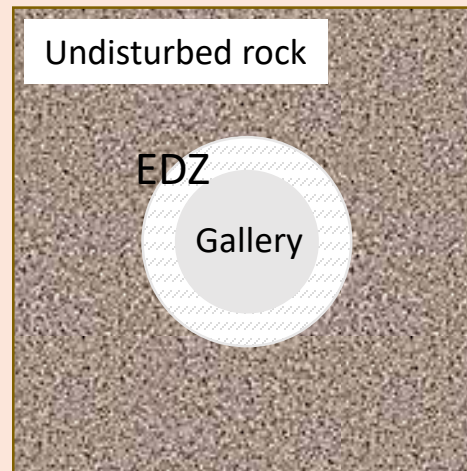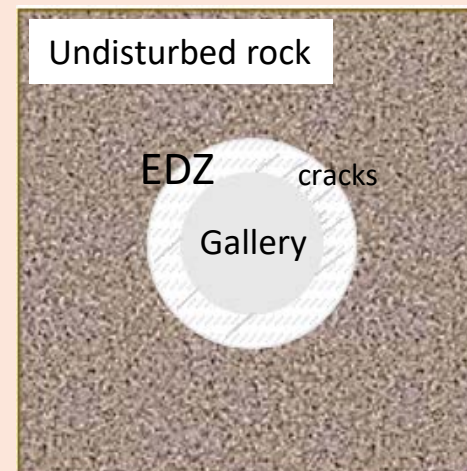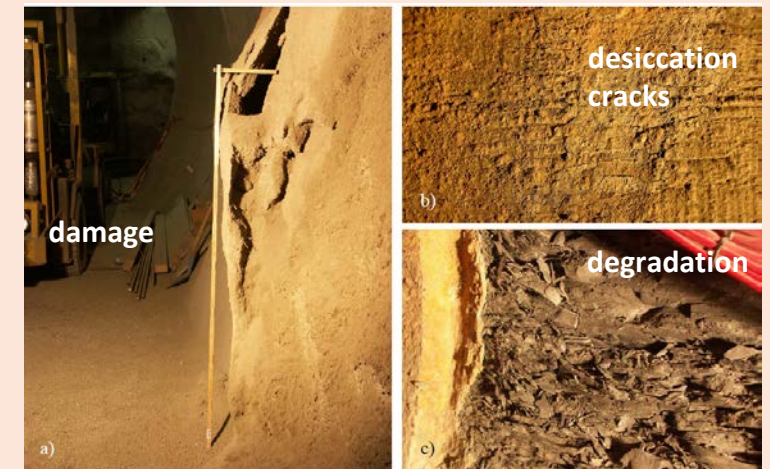

OPA [Technischer Bericht 14-02 Nagra]

# Practical steps

## Formulation

- The “host” rock
- Mont Terri Rock Laboratory

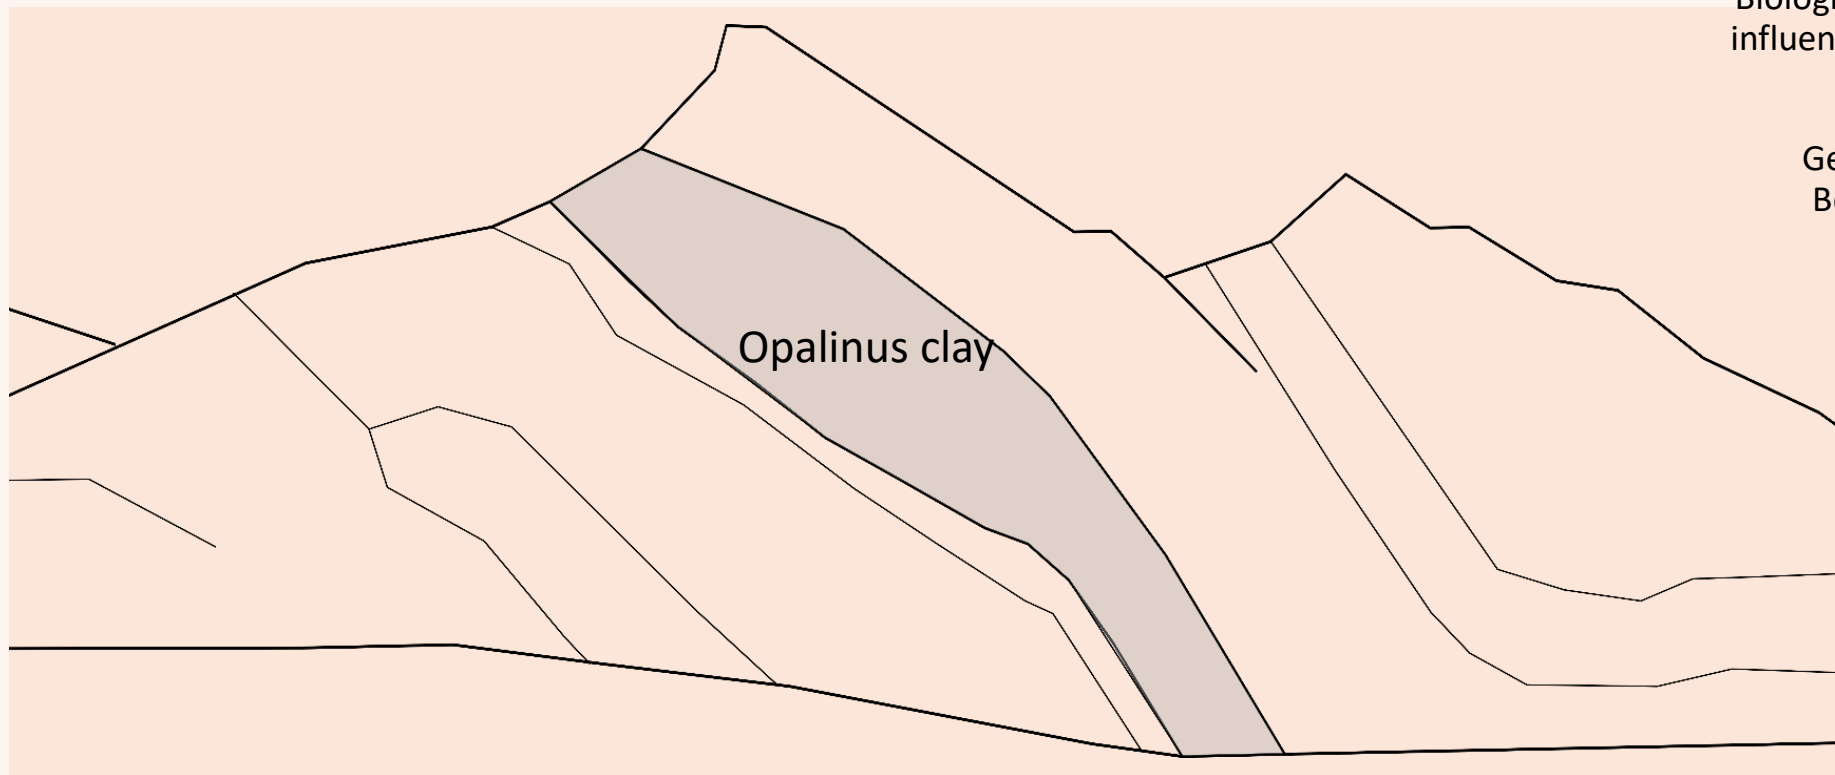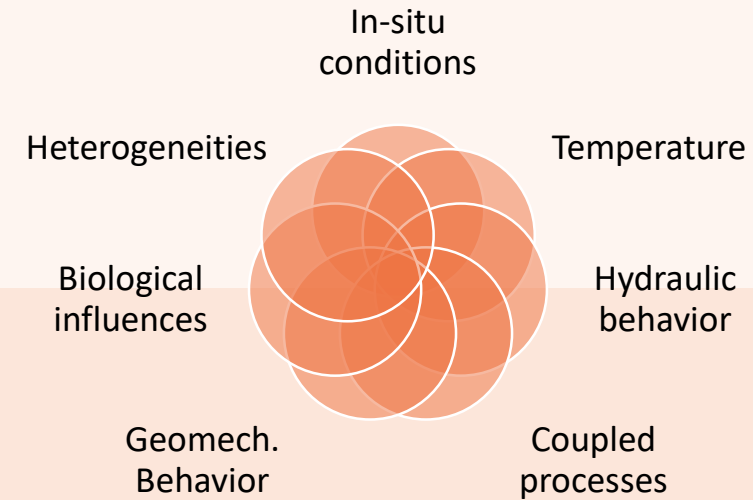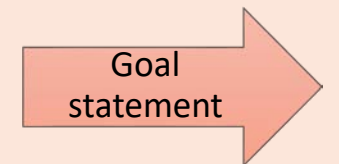

What are the points we would like to tackle?



# Practical steps

## Simplification

- Cyclic-Deformation (CD-A) experiment: *free* twin niches

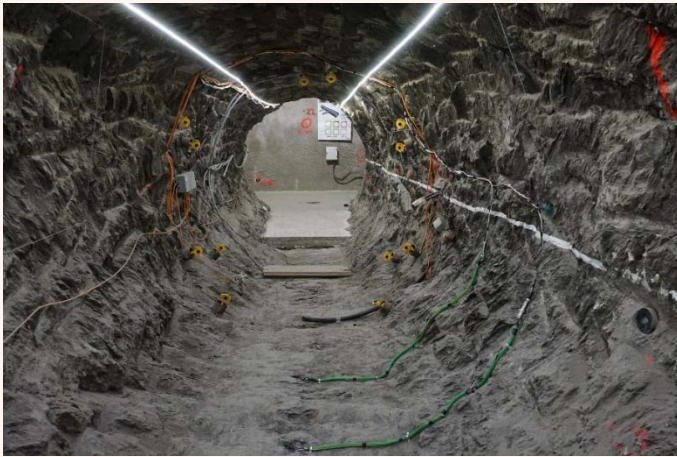

Open niche

- Seasonal humidity variations

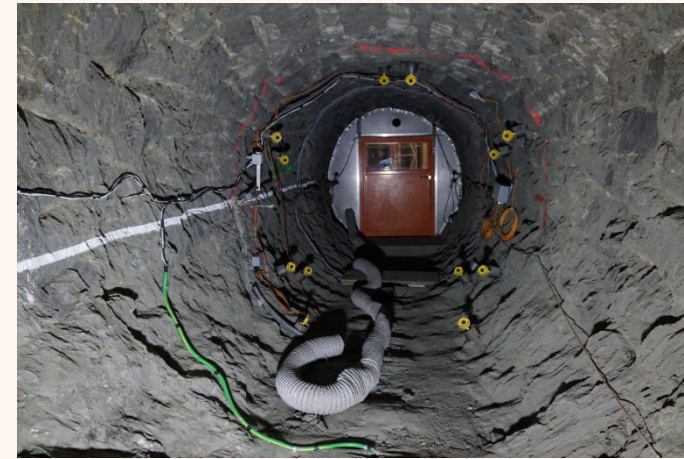

Closed niche

- Controlled high humidity

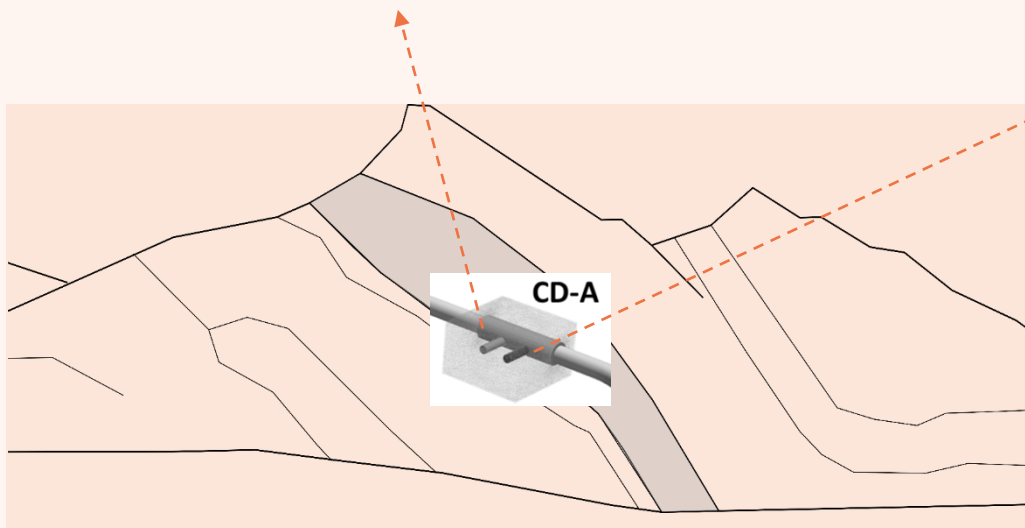

Simplifications

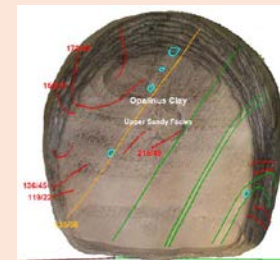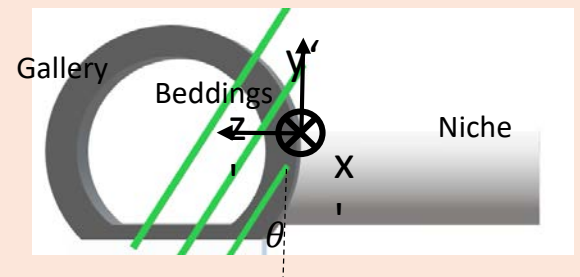

# Practical steps

## Mathematical modeling

- Hydro-mechanical (HM) framework

- Balance equations

$$\nabla \cdot (nS_l \mathbf{v}_{ls}) + \rho_l \left[ C_s \frac{\partial p_l}{\partial t} + S_l \alpha \frac{\partial \text{tr}(\nabla^s \mathbf{u})}{\partial t} \right] = 0$$

$$\nabla \cdot (\boldsymbol{\sigma}' - \alpha S_l p_l \mathbf{I}) + nS_l \rho_l \mathbf{g} + (1 - n) \rho_s \mathbf{g} = \mathbf{0}$$

- Constitutive relations

- Transversely isotropic, linear elastic material
  - Van Genuchten fitting

- Initial conditions

$$p_w = p_{w_0} \text{ at } t = 0$$

$$\mathbf{u} = \mathbf{u}_0 \text{ at } t = 0$$

$$\sigma_0 \text{ at } t = 0$$

- Capillary pressure (**Richards** assumption)

$$p_c = p_g - p_l$$

$$p_g = p_{\text{atm}}$$

- Rate of liquid flow (Darcy's law)

$$nS_l \mathbf{v}_{ls} = -\rho_l k_{rl} \frac{\mathbf{K}_i}{\mu_l} (\nabla p_l - \rho_l \mathbf{g})$$

- Boundary conditions

$$\mathbf{u} = \bar{\mathbf{u}} \text{ on } \Gamma_u$$

$$\boldsymbol{\sigma} \cdot \mathbf{n} = \bar{\mathbf{t}} \text{ on } \Gamma_t$$

$$p_w = \bar{p}_l \text{ on } \Gamma_p$$

$$\bar{q} \text{ on } \Gamma_q$$

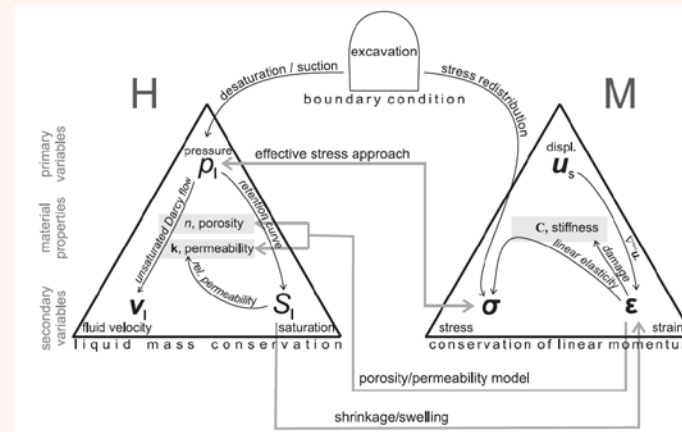

[Maßmann 2009]



# Practical steps

## Numerical modeling

- Design
- First predictions using independent (in-/output) data from the experiment

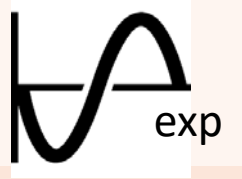

IC

$\sigma_{in-situ}$

$p_{in-situ}$

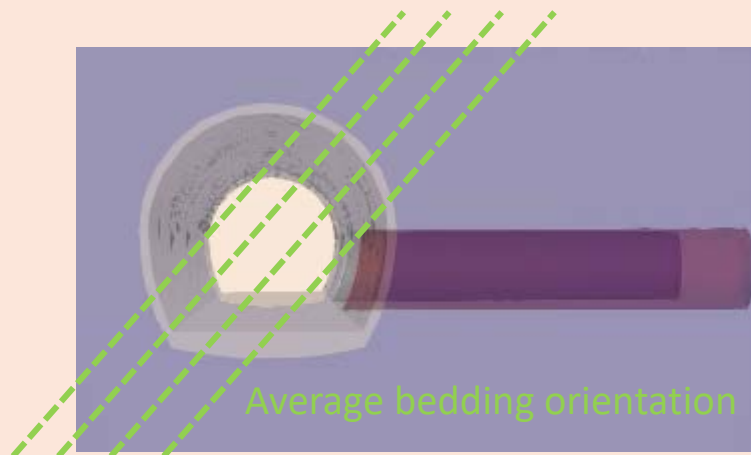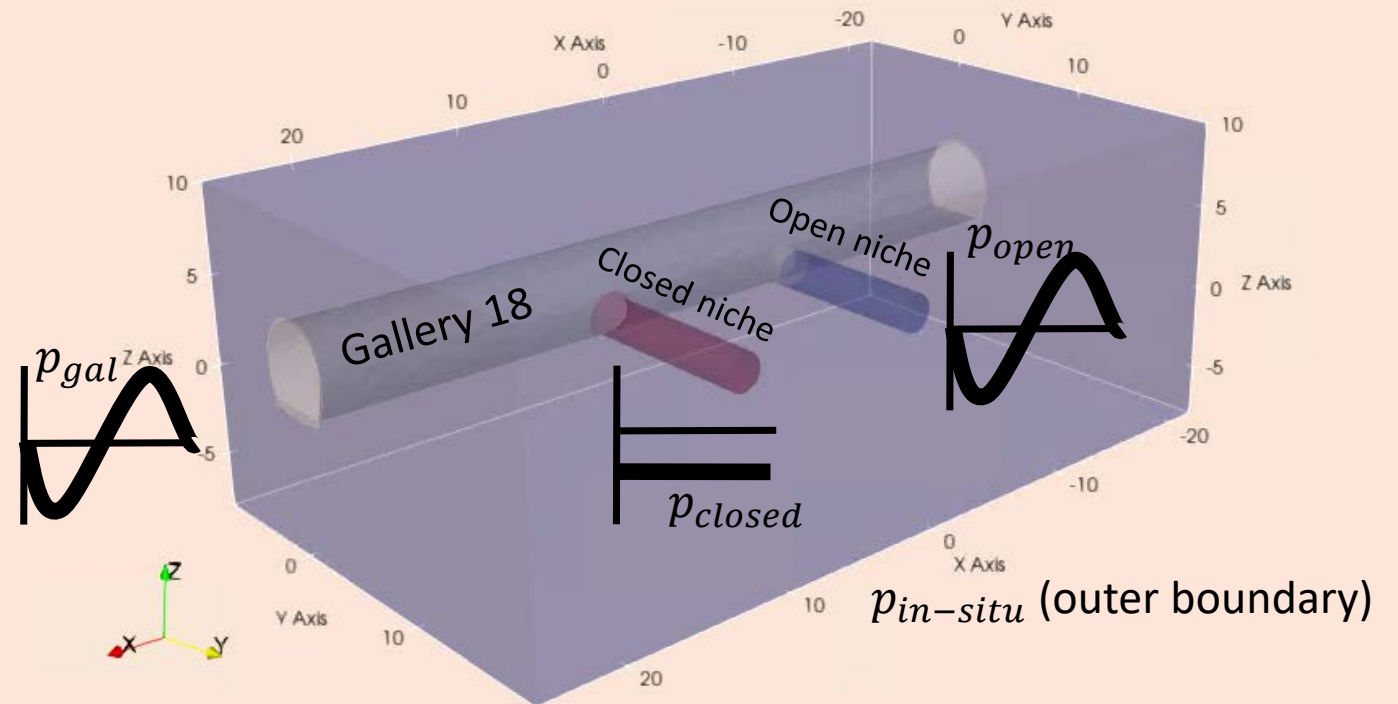

# Practical steps

## Numerical modeling

- Initial conditions and influence of excavation
- Hydro-mechanical behavior (long-term)
- Comparison with experiments within interdisciplinary approach Ziefle et al. 2021 (under review)

- Integrity?
- How far is the near field?

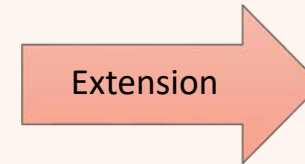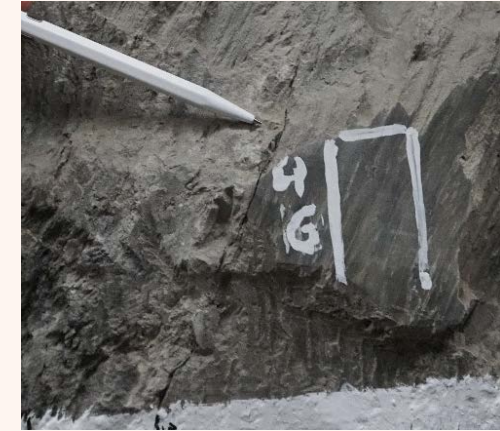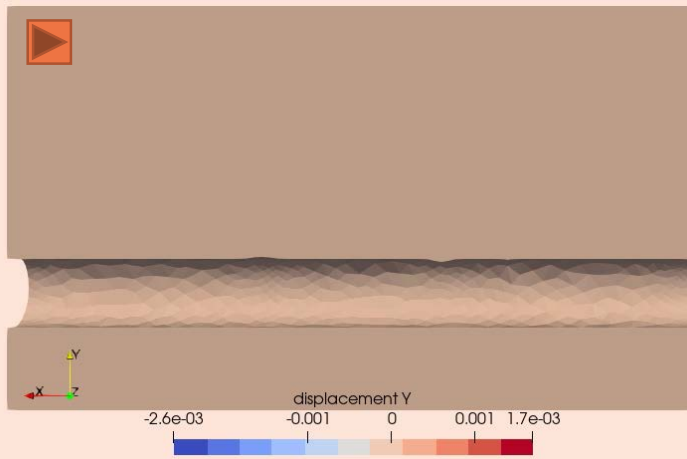

Displacement during excavation (HM)

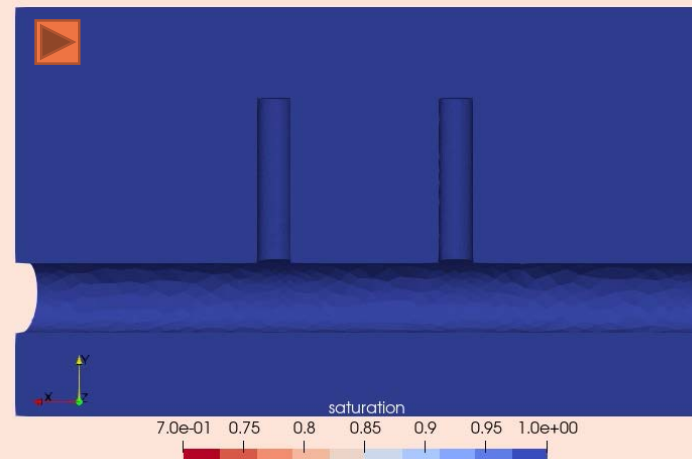

Saturation (HM)

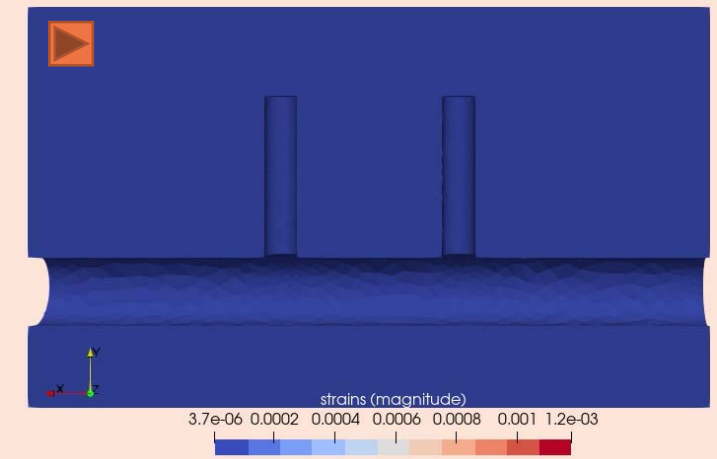

Strains (HM)

# Practical steps

## Model extension

- Identification of the mechanisms at the field and laboratory scales: shrinkage-swelling, cracking
- Application of the method in the smaller scale: assessment of numerical problems
- Adaptation and verification at larger scale

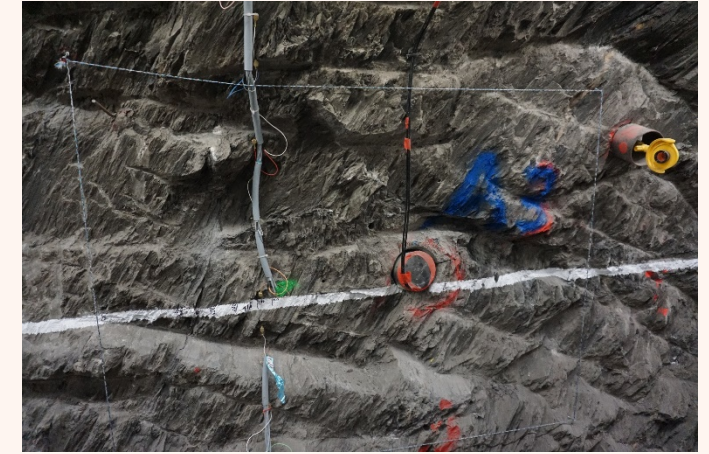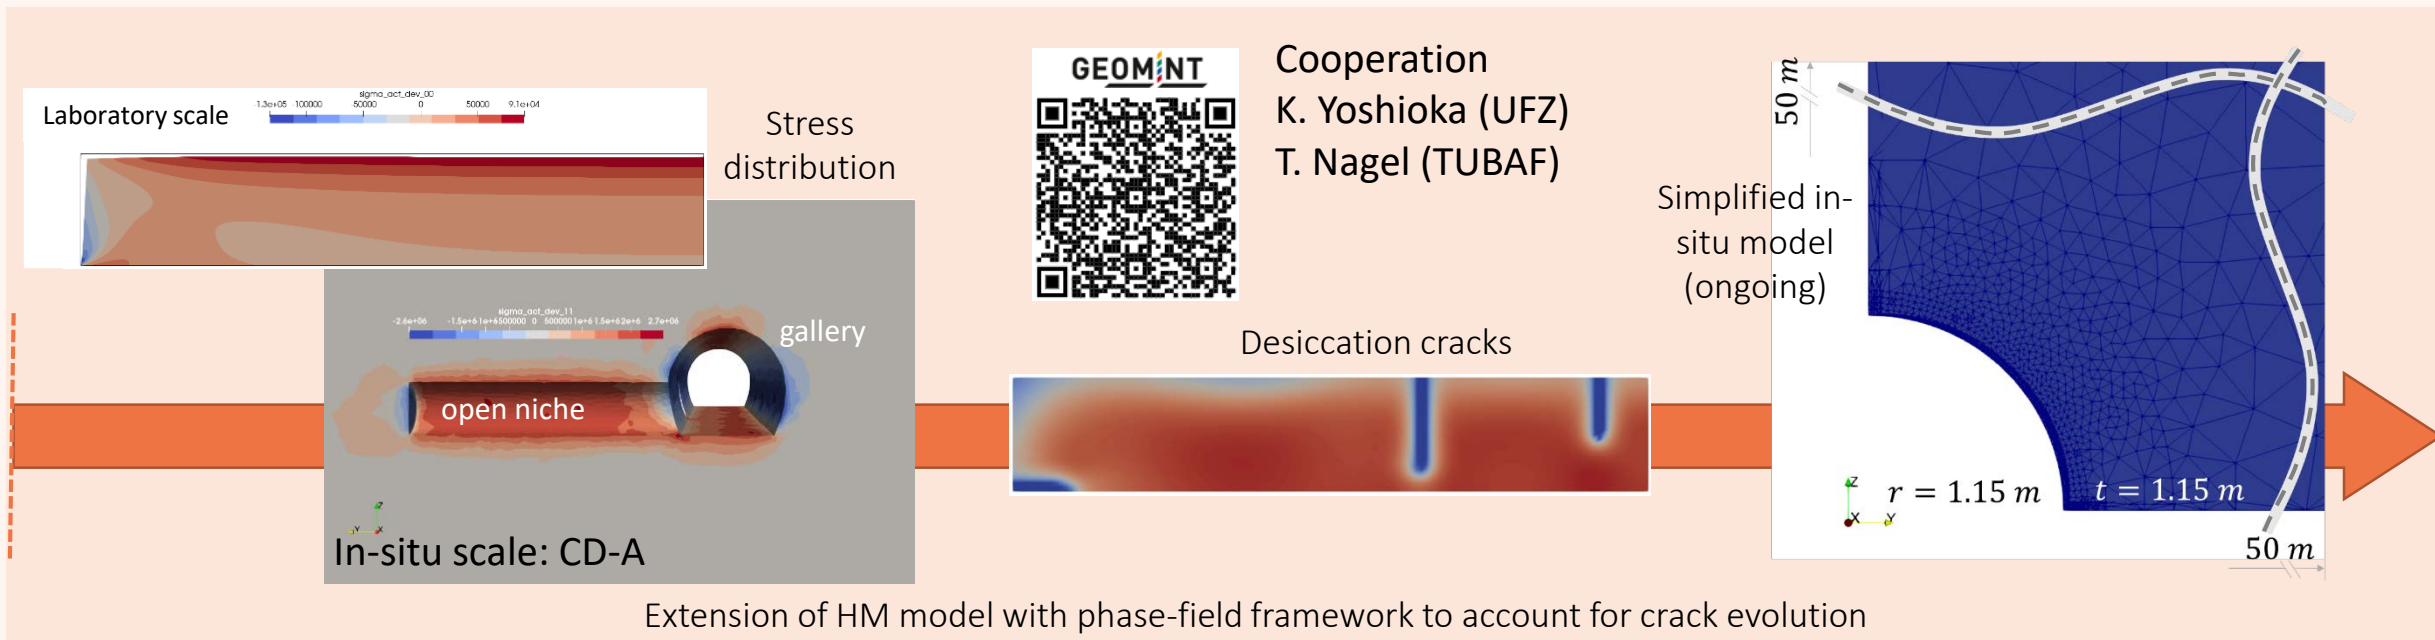

- Correlate process understanding and integrity requirements
- Practical steps on numerical modeling
  - CD-A experiment, Mont Terri
  - Use of experimental data
  - Simulation of excavation and long-term behavior
- Further development and application of numerical methods
  - Identification of mechanisms at laboratory and field scales
  - Concept and perspectives for modeling cracking
  - Transfer between the scales
